# Supplementary material for: Silver-reinforced cellulose hybrids with enhanced antibacterial activity: synthesis, characterization, and mechanism
Source: Royal Society of Chemistry journal article supplement (doi:10.1039/c5ra19758a), 2015-01-01
Supplement: c5ra19758a1.pdf [file c5ra19758a1.pdf]

Supporting Information:

## Silver-reinforced cellulose hybrids with enhanced antibacterial activity: Synthesis, characterization, and mechanism

Yan-Yan Dong<sup>a</sup>, Lian-Hua Fu<sup>a</sup>, Shan Liu<sup>a</sup>, Ming-Guo Ma<sup>a\*</sup>, Bo Wang<sup>a</sup>

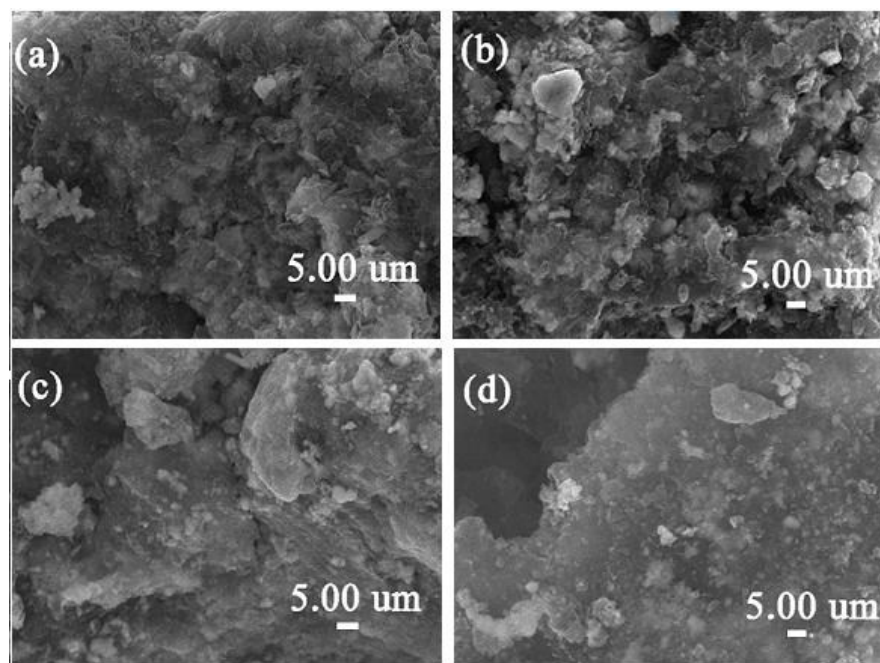

**Fig. S1** TEM images of the hybrids synthesized by hydrothermal method at 160 °C for different times: (a) 3 h, (b) 6 h, (c) 9 h, (d) 12 h, respectively.

---

<sup>a</sup>Beijing Key Laboratory of Lignocellulosic Chemistry, College of Materials Science and Technology, Beijing Forestry University, Beijing 100083, PR China, Fax: +86-10-62336903  
E-Mail: mg\_ma@bjfu.edu.cn (M.-G. Ma)

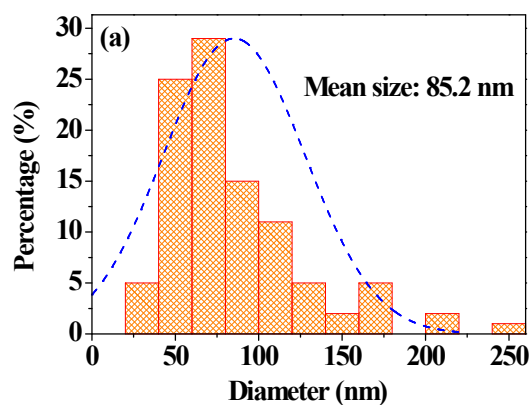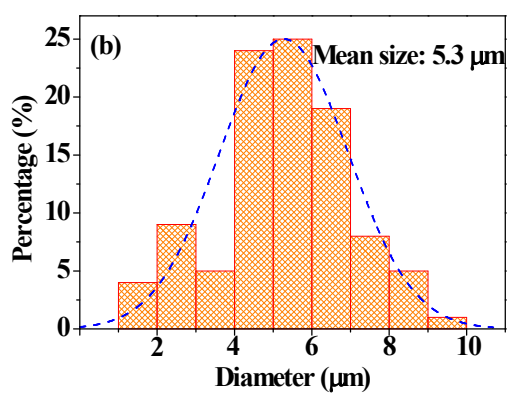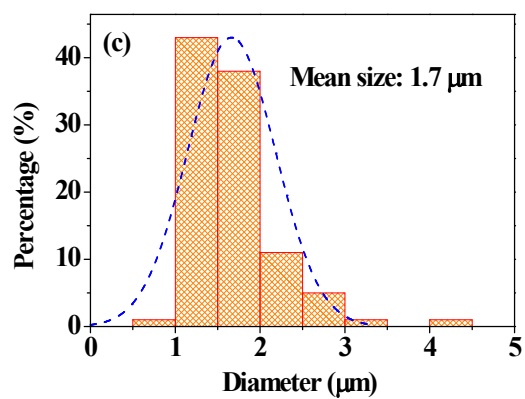

**Fig. S2** Size distributions of cellulose/Ag/AgCl hybrids synthesized at 160 °C for 12 h: (a) cellulose solution; (b) NaOH/urea solution; (c) 0.324 g MCC.
